# Supplementary material for: Efficient protective activity of a planar catechin analogue against radiation-induced apoptosis in rat thymocytes
Source: Royal Society of Chemistry journal article supplement (doi:10.1039/c7ra13111a), 2018-01-01
Supplement: c7ra13111a1.pdf [file c7ra13111a1.pdf]

**Electronic Supplementary Information (ESI)**

**Efficient protective activity of a planar cartechin analogue  
against radiation-induced apoptosis in rat thymocytes**

**Emiko Sekine-Suzuki,<sup>a</sup> Ikuo Nakanishi,<sup>\*a</sup> Kohei Imai,<sup>ab</sup> Megumi Ueno,<sup>a</sup>  
Takashi Shimokawa,<sup>\*a</sup> Ken-ichiro Matsumoto<sup>a</sup> and Kiyoshi Fukuhara,<sup>\*b</sup>**

<sup>a</sup> *Quantitative RedOx Sensing Team (QRST), Department of Basic Medical Sciences for Radiation Damages, National Institute of Radiological Sciences (NIRS), National Institutes for Quantum and Radiological Science and Technology (QST), Inage-ku, Chiba 263-8555, Japan.*

<sup>b</sup> *School of Pharmacy, Showa University, Shinagawa-ku, Tokyo 142-8555, Japan.*

E-mail: nakanishi.ikuo@qst.go.jp, shimokawa.takashi@qst.go.jp,  
fukuhara@pharm.showa-u.ac.jp

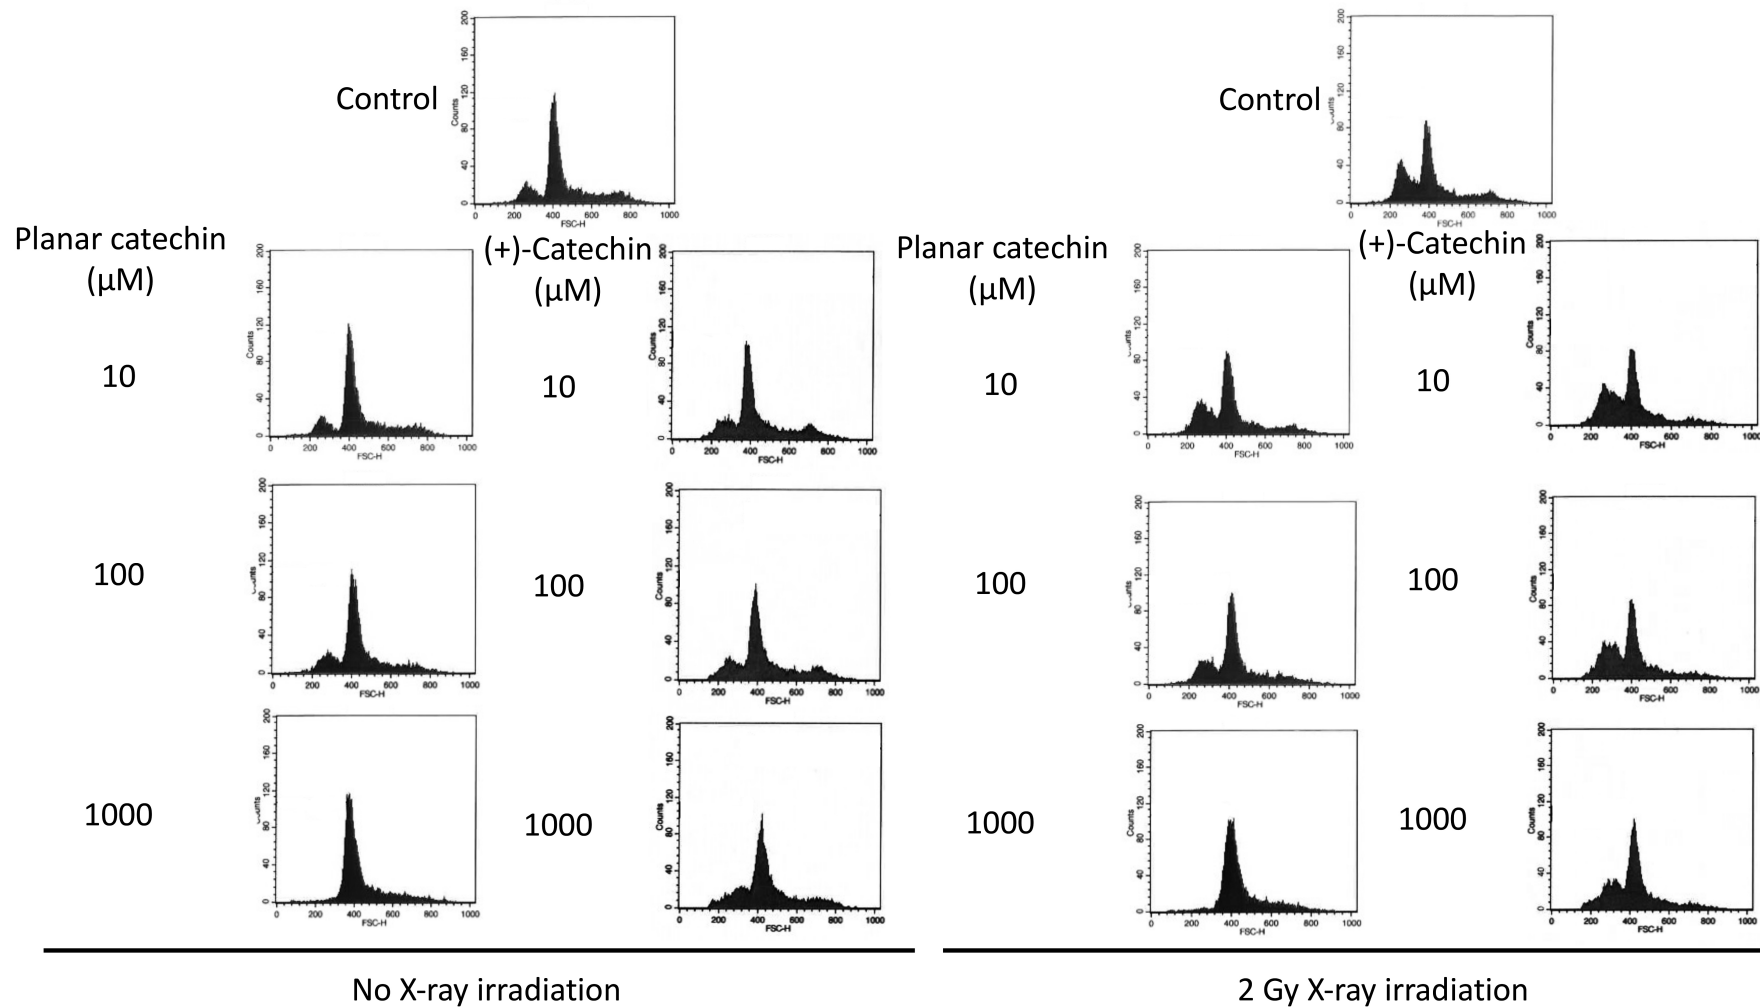

**Fig. S1** Flow cytometer analysis of the rat thymocytes. Cells were incubated in the presence of 0.1% DMSO with or without catechins (0, 10, 100 and 1000  $\mu\text{M}$ ) for 4h after X-ray irradiation (0 or 2 Gy).
